# Supplementary material
Source: publisher figshare collection journal article supplement (https://gsapubs.figshare.com/articles/dataset/_/20126420)
Supplement: Supplementary file 1 [file 1]

Feifei Zhang, Yifan Wang, Peter A. Cawood, Yunpeng Dong, and Chenghui Xin, 2022, Reworking of Yangtze crust into the mantle lithosphere of the North China Craton along the Dabie–East Qinling Orogen: Evidence from the Early Cretaceous volcanic rocks: GSA Bulletin, <https://doi.org/10.1130/B36395.1>.

## Supplemental Material

**Table S1.** Zircon U-Pb dating results for the Early Cretaceous volcanic rocks in the eastern and western NHB and Daying Volcanics in East Qinling Orogen.

**Table S2.** Zircon in-situ Hf-O analytical results for the Early Cretaceous volcanic rocks in the eastern and western NHB and Daying Volcanics in East Qinling Orogen.

**Table S3.** In-situ major element compositions of clinopyroxenes from eastern North Huaiyang belt.

**Table S4.** Major oxides, elemental and Sr-Nd-Pb isotopic analytical results for the Early Cretaceous volcanic rocks in the eastern and western NHB and Daying Volcanics in East Qinling Orogen.
